# Supplementary material for: Altered gut microbiota in female mice with persistent low body weights following removal of post-weaning chronic dietary restriction
Source: PubMed Central journal article supplement (PMC5048651; doi:10.1186/s13073-016-0357-1), 2016-10-03

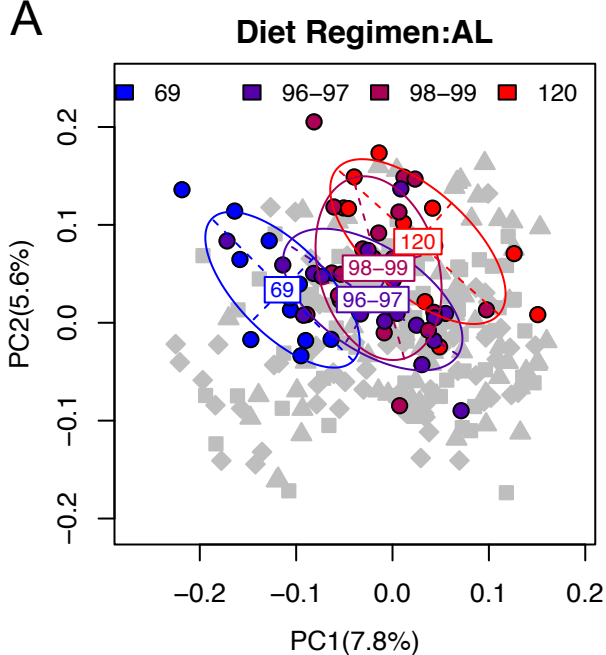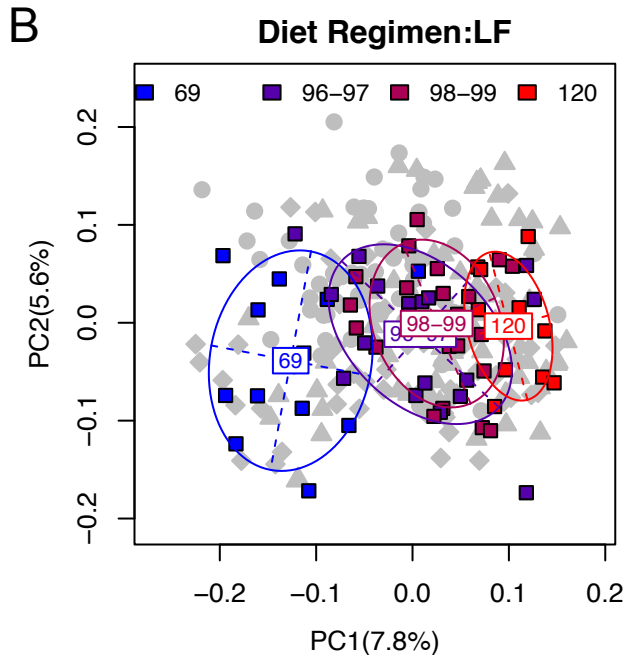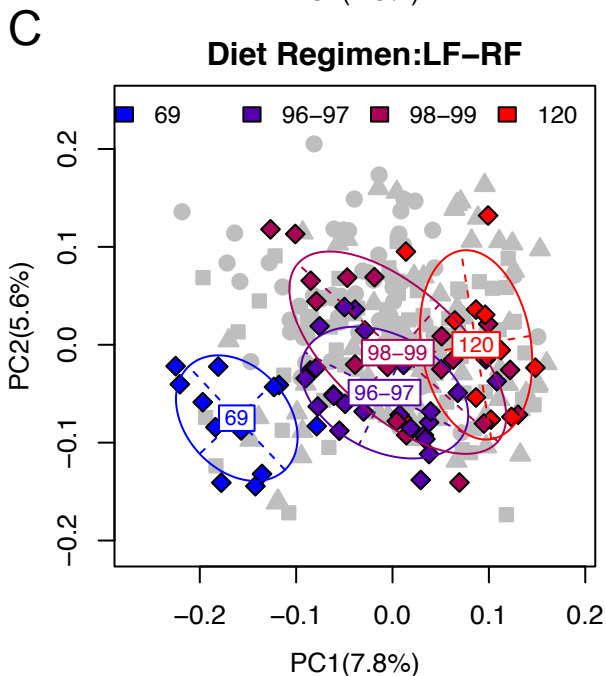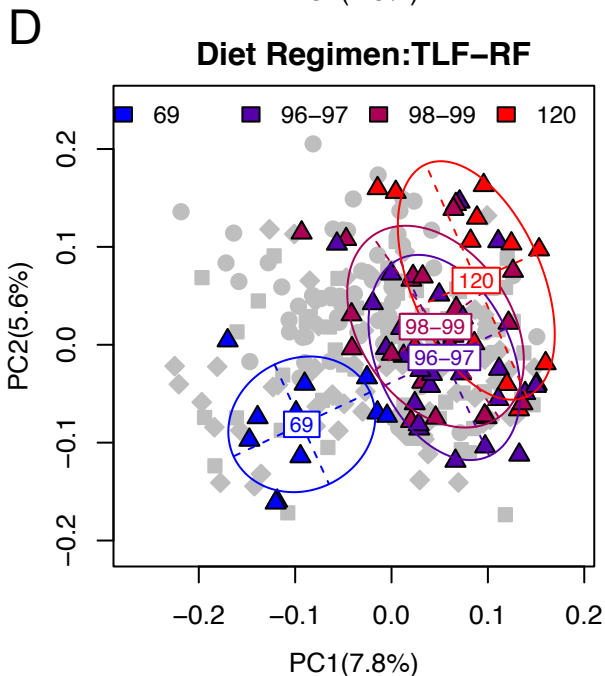

Supplement: 13073_2016_357_MOESM2_ESM.pdf [file 13073_2016_357_MOESM2_ESM.pdf]
